# Supplementary material for: Production of renewable alcohols from maple wood using supercritical methanol hydrodeoxygenation in a semi-continuous flowthrough reactor
Source: Royal Society of Chemistry journal article supplement (doi:10.1039/d0gc03218b), 2020-01-01
Supplement: d0gc03218b1.pdf [file d0gc03218b1.pdf]

# Production of Renewable Alcohols from Maple Wood using Supercritical Methanol Hydrodeoxygenation in a Semi-continuous Flowthrough Reactor

**Authors:** Peter H. Galebach<sup>†</sup>, Jimmy K. Soeherman<sup>†</sup>, Elise Gilcher<sup>†</sup>, Ashley M. Wittrig<sup>‡</sup>, Jillian Johnson<sup>‡</sup>, Thomas Fredriksen<sup>‡</sup>, Chengrong Wang<sup>‡</sup>, Michael P. Lanci<sup>‡</sup>, James A. Dumesic<sup>†</sup>, George W. Huber<sup>†</sup>

Affiliations:

<sup>†</sup> Department of Chemical and Biological Engineering, University of Wisconsin, 1415 Engineering Drive, Madison, Wisconsin 53706, United States.

<sup>‡</sup> ExxonMobil Research and Engineering, 3545 Route 22 East, Annandale, NJ 08801, United States.

\* Corresponding Author: George W. Huber

Tel: +1 413 695 8032, E-mail: [gwhuber@wisc.edu](mailto:gwhuber@wisc.edu)

Number of pages: 5

Number of figures: 3

Number of tables: 4

**Table S1.** Weight percent and composition of maple wood solubilized at 190, 230, 270, 300, and 330°C. Conditions: 190-330°C, 2-6 hours, 0.6 g maple wood, 0.3 mL min<sup>-1</sup> methanol flowrate for 190-230°C points and 0.18 mL min<sup>-1</sup> for 270-330°C points to maintain liquid residence time in reactor at varying density.

| Temperature (°C) | Reaction time (h) | Biomass remaining (wt%) | Unsolubilized holocellulose (wt%) | Char/coke (wt%) |
|------------------|-------------------|-------------------------|-----------------------------------|-----------------|
| 190              | 2                 | 71.2                    | 59.3                              | 11.8            |
| 230              | 2                 | 53.7                    | 39.6                              | 14.2            |
| 230              | 6                 | 53.3                    | 45.7                              | 7.6             |
| 270              | 2                 | 48.7                    | 32.2                              | 16.5            |
| 300              | 2                 | 30.5                    | 13.0                              | 17.4            |
| 300              | 6                 | 19.6                    | 2.0                               | 17.6            |
| 330              | 2                 | 22.5                    | 0.0                               | 22.5            |
| 190+300          | 2+2               | 36.4                    | 26.1                              | 10.3            |
| 230+330          | 2+2               | 18.7                    | 2.4                               | 16.3            |
| 190+230+300+330  | 1+1+1+1           | 14.0                    | 6.6                               | 7.3             |

**Table S2.** Composition of C2-C6 products in biomass conversion with catalyst regeneration.

|                                    | Mol C% of C2-C6 products |      |      |      |      |      |
|------------------------------------|--------------------------|------|------|------|------|------|
|                                    | Bed1                     | Bed2 | Bed3 | Bed4 | Bed5 | Bed6 |
| <u>Alcohols</u>                    |                          |      |      |      |      |      |
| ethanol                            | 16.4                     | 15.7 | 16.3 | 14.9 | 16.8 | 13.4 |
| 1-propanol                         | 10.1                     | 9.5  | 9.8  | 9.2  | 0.5  | 8.8  |
| 2-propanol                         | 2.6                      | 2.8  | 2.6  | 2.3  | 2.3  | 2.1  |
| 1-butanol                          | 3.8                      | 3.6  | 3.8  | 3.3  | 4.0  | 3.1  |
| 2-butanol                          | 9.5                      | 9.4  | 9.3  | 8.7  | 9.2  | 8.1  |
| isobutanol                         | 11.5                     | 11.9 | 12.9 | 13.0 | 14.9 | 12.9 |
| 1-pentanol                         | 1.2                      | 0.9  | 1.0  | 1.0  | 1.4  | 1.1  |
| 2-pentanol                         | 4.3                      | 4.2  | 4.3  | 3.7  | 4.0  | 3.5  |
| 3-pentanol                         | 3.5                      | 3.4  | 3.5  | 3.0  | 3.2  | 2.8  |
| 2-methyl-1-butanol                 | 9.9                      | 9.9  | 9.9  | 10.5 | 16.6 | 14.0 |
| 1-hexanol                          | 0.5                      | 0.5  | 0.5  | 0.6  | 0.6  | 0.7  |
| 2-hexanol                          | 1.4                      | 1.3  | 1.3  | 1.1  | 1.3  | 1.1  |
| 3-hexanol                          | 2.8                      | 3.2  | 3.0  | 3.0  | 3.0  | 3.0  |
| 2-methyl-1-pentanol                | 3.9                      | 3.8  | 4.1  | 3.9  | 4.5  | 4.0  |
| <u>Esters, Ethers, and ketones</u> |                          |      |      |      |      |      |
| methyl acetate                     | 4.6                      | 5.1  | 4.6  | 6.8  | 5.1  | 6.5  |
| methyl propanoate                  | 3.5                      | 3.3  | 2.9  | 4.1  | 2.2  | 3.7  |
| methyl butyrate                    | 2.1                      | 2.3  | 2.0  | 2.5  | 1.0  | 2.6  |
| 2-methoxy ethanol                  | 3.6                      | 4.4  | 4.6  | 4.9  | 4.9  | 5.1  |
| 1-methoxy 2-propanol               | 4.4                      | 4.8  | 3.7  | 3.6  | 4.5  | 3.5  |

**Table S3.** Composition of C2-C6 products in multi-temperature catalyst bed reaction.

|                             | Mol C% of C2-C6 products |      |      |      |      |      |
|-----------------------------|--------------------------|------|------|------|------|------|
|                             | Bed1                     | Bed2 | Bed3 | Bed4 | Bed5 | Bed6 |
| Alcohols                    |                          |      |      |      |      |      |
| ethanol                     | 19.6                     | 18.1 | 17.8 | 17.7 | 16.3 | 15.9 |
| 1-propanol                  | 10.5                     | 9.5  | 9.3  | 9.1  | 9.2  | 8.6  |
| 2-propanol                  | 3.2                      | 3.2  | 3.3  | 3.4  | 2.9  | 3.0  |
| 1-butanol                   | 5.6                      | 4.8  | 4.7  | 4.7  | 4.8  | 4.1  |
| 2-butanol                   | 8.8                      | 8.9  | 9.0  | 9.0  | 8.4  | 8.5  |
| isobutanol                  | 12.3                     | 12.5 | 12.5 | 12.3 | 13.5 | 13.6 |
| 1-pentanol                  | 4.3                      | 4.0  | 3.8  | 3.6  | 3.8  | 3.0  |
| 2-pentanol                  | 3.6                      | 3.7  | 3.5  | 3.6  | 3.6  | 3.6  |
| 3-pentanol                  | 3.0                      | 3.2  | 2.9  | 2.6  | 3.1  | 2.8  |
| 2-methyl-1-butanol          | 7.6                      | 8.2  | 8.0  | 7.8  | 9.0  | 9.2  |
| 1-hexanol                   | 1.5                      | 1.4  | 1.5  | 1.2  | 1.4  | 1.3  |
| 2-hexanol                   | 1.0                      | 1.0  | 1.0  | 1.0  | 1.1  | 1.0  |
| 3-hexanol                   | 2.3                      | 2.4  | 2.4  | 2.3  | 2.7  | 2.6  |
| 2-methyl-1-pentanol         | 2.8                      | 2.5  | 2.4  | 2.3  | 2.6  | 2.3  |
| Esters, Ethers, and ketones |                          |      |      |      |      |      |
| methyl acetate              | 5.1                      | 5.9  | 6.7  | 7.4  | 6.2  | 7.8  |
| acetone                     | 0.5                      | 0.6  | 0.6  | 0.6  | 0.5  | 0.0  |
| methyl propanoate           | 2.1                      | 2.3  | 2.4  | 2.6  | 2.5  | 3.0  |
| methyl butyrate             | 2.1                      | 2.3  | 2.4  | 2.7  | 2.4  | 2.7  |
| 2-methoxy ethanol           | 3.9                      | 4.8  | 5.1  | 5.5  | 5.3  | 6.0  |
| 1-methoxy 2-propanol        | 0.3                      | 0.9  | 0.9  | 0.9  | 0.9  | 1.0  |

**Table S4.** Composition of C2-C6 products from batch reactions at varying biomass loading.

|                             | Mol C% of C2-C6 products |       |        |        |           |
|-----------------------------|--------------------------|-------|--------|--------|-----------|
|                             | 4 wt%                    | 8 wt% | 10 wt% | 20 wt% | 10+10 wt% |
| Alcohols                    |                          |       |        |        |           |
| ethanol                     | 20.0                     | 19.6  | 19.7   | 20.4   | 20.5      |
| 1-propanol                  | 8.9                      | 9.3   | 10.0   | 10.3   | 9.6       |
| 2-propanol                  | 3.3                      | 3.2   | 3.0    | 2.9    | 3.3       |
| 1-butanol                   | 4.7                      | 5.1   | 5.5    | 6.3    | 5.8       |
| 2-butanol                   | 10.3                     | 10.2  | 9.7    | 8.7    | 9.0       |
| isobutanol                  | 11.8                     | 11.8  | 11.9   | 13.1   | 11.8      |
| 1-pentanol                  | 4.3                      | 4.9   | 5.3    | 6.4    | 5.8       |
| 2-pentanol                  | 4.0                      | 4.0   | 3.6    | 3.6    | 3.7       |
| 3-pentanol                  | 3.2                      | 3.0   | 3.1    | 2.7    | 2.8       |
| 2-methyl-1-butanol          | 6.3                      | 6.4   | 6.6    | 7.4    | 6.4       |
| 1-hexanol                   | 3.2                      | 3.5   | 3.3    | 2.4    | 3.3       |
| 2-hexanol                   | 2.1                      | 2.1   | 1.8    | 1.5    | 1.8       |
| 3-hexanol                   | 3.2                      | 3.0   | 2.7    | 2.6    | 3.1       |
| 2-methyl-1-pentanol         | 2.2                      | 2.3   | 2.6    | 2.6    | 2.3       |
| Esters, Ethers, and ketones |                          |       |        |        |           |
| methyl acetate              | 3.3                      | 2.5   | 2.5    | 1.6    | 2.2       |
| acetone                     | 0.9                      | 1.0   | 0.6    | 0.3    | 0.6       |
| methyl propanoate           | 1.3                      | 1.3   | 1.4    | 1.0    | 1.1       |
| methyl butyrate             | 2.0                      | 2.1   | 2.0    | 1.5    | 2.2       |
| 2-methoxy ethanol           | 4.3                      | 3.7   | 3.5    | 3.5    | 3.4       |
| 1-methoxy 2-propanol        | 0.6                      | 0.9   | 1.4    | 1.0    | 1.5       |

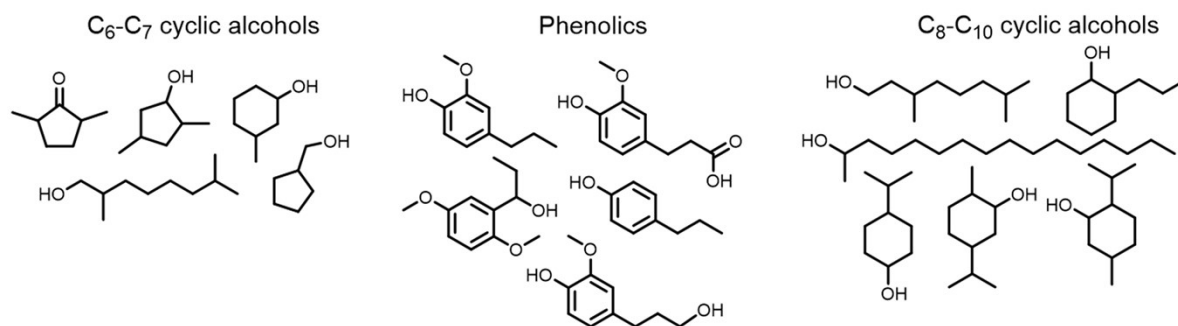

**Figure S1.** Product types of high boiling compounds from close matches in a Shimadzu GC-2010 MS after SCM-DHDO of maple wood.

### 190-230°C products

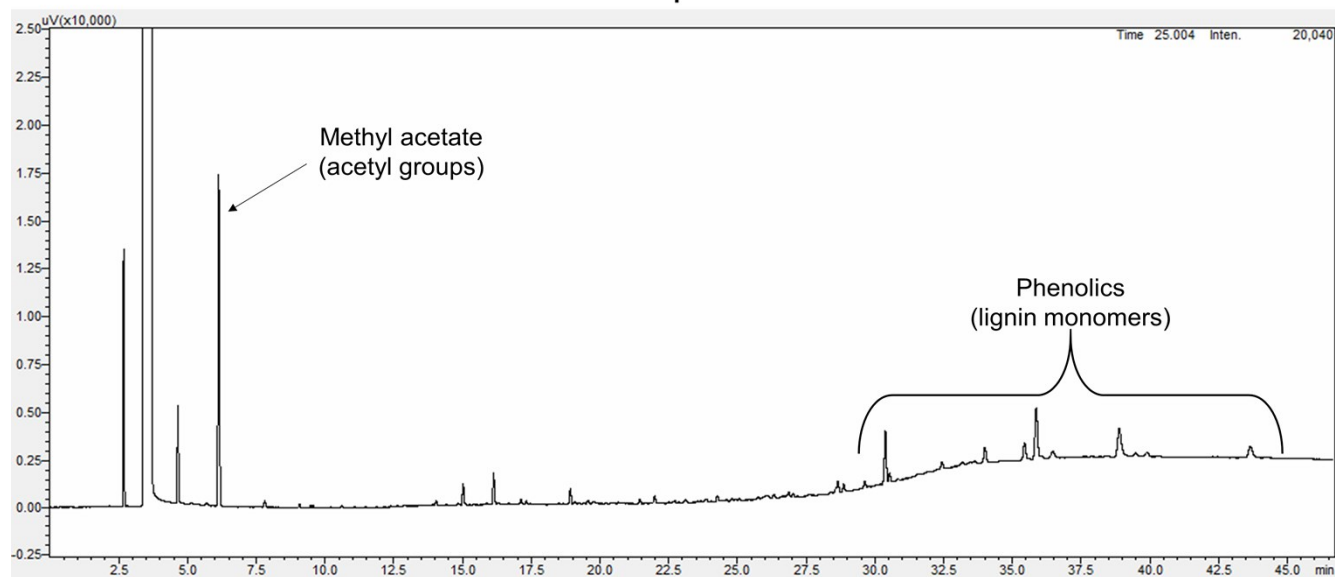

**Figure S2.** 190-230°C products from multi-temperature catalyst bed reaction with maple wood.

### 300-330°C products

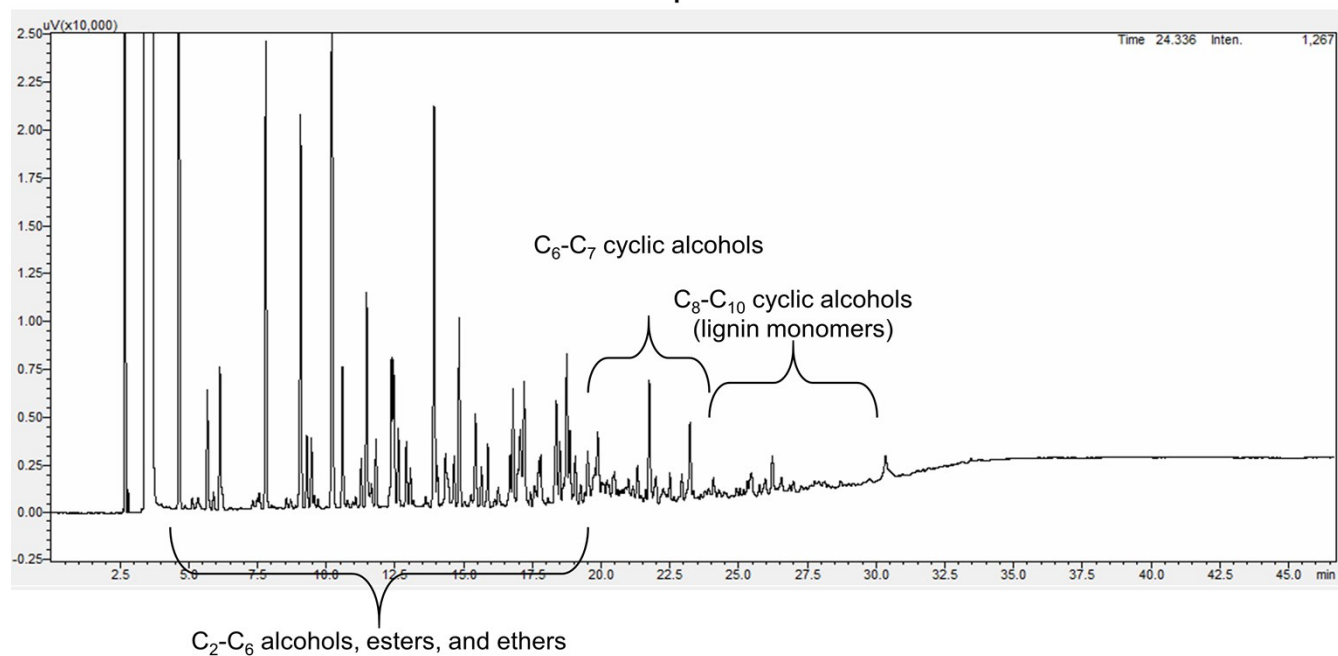

**Figure S3.** 300-330°C products from multi-temperature catalyst bed reaction with maple wood.
